# Supplementary material for: What Messages are Adolescent Voluntary Medical Male Circumcision (VMMC) Clients Getting and How? Findings From an Observational Study in Tanzania
Source: Springer Nature journal article supplement (doi:10.1007/s10461-016-1515-6), 2016-08-24
Supplement: MOESM2 [file 10614728]

**Tulane University Human Research Protection Office**  
**Biomedical IRB Consent Script for Participation in a Research Study**  
*Integration of HIV Counseling and Testing with Voluntary Medical Male Circumcision*

**Principal Investigator:** Katherine Andrinopoulos

**Study Title:** Integration of HIV Counseling and Testing with Voluntary Medical Male Circumcision Services

**Performance Sites:** Iringa, Tanzania

**Sponsor:** United States Agency for International Development

**Client observation and survey – guardian**

**Introduction**

Your child is invited to participate in a research study to look for ways to strengthen HIV testing and counseling when a man comes for circumcision. They are being asked to participate because they are client of a male circumcision services. In total, about 400 clients throughout Iringa will be asked to participate in this part of the study.

**Why is this study being done?**

We are conducting this research study to find ways to support HIV testing and counseling when a man comes for circumcision and linkages across different types of HIV services. This requires that we understand how HIV testing and counseling is now being offered and discussed in male circumcision programs. We also need to know how effective HIV testing and counseling is when it is offered in male circumcision programs. That requires that we understand how much information men retain from the counseling session and what behaviors they intend to engage in, in the future.

**What are the study procedures? What will my child be asked to do?**

If you agree for your child to take part in this study, a research team member will observe the counseling services they are provided today and when they come back for their follow-up visit for male circumcision. When they come back they will also be asked to complete a survey. Survey questions will cover demographic, health status, and behavioral information. We will also ask them about their experiences with the services received and the information about the counseling session. The survey will be administered in a private room in the clinic after they have completed their follow-up appointment. The survey will take approximately 45 minutes. We will also look at information that is on their client card at this clinic.

Version Date: June 20, 2012

Approval Date: \_\_\_\_\_

Sign By Date: \_\_\_\_\_

Page 1 of 4

Subject Initials: \_\_\_\_\_

**Tulane University Human Research Protection Office**  
**Biomedical IRB Consent Script for Participation in a Research Study**  
*Integration of HIV Counseling and Testing with Voluntary Medical Male Circumcision*

**What are the risks or inconveniences of the study?**

A possible inconvenience may be the time it takes to complete the survey. If this is a problem, you or your child can choose to end the observation and survey if you change your minds at any point.

We will be careful to keep your child's information private. However, a possible risk is that by accident someone outside the study team learns the information your child shared with us. We assure you that we will make every effort to keep your child's information private. We will not record your child's name or other identifying information on any data collection tools. Instead a code number will be used. We will secure these tools and all study records. We will not share any of the information your child tells us with anyone else, including people who work at this clinic. We will combine the information your child shares with us with the information from other participants. We will only present this information in summary form. No one's name will be used in any presentation of the results from this study.

Some of the questions are personal in nature. Another possible risk is that these questions may cause your child to feel embarrassed. If this happens, your child can skip any question they do not want to answer. We will remind them of this and their ability to end the observation and survey at any point.

**What are the benefits of the study?**

Your child may not directly benefit from this research. However, we hope that their participation in the study may help us understand how to improve HIV testing and counseling and other HIV services.

**Will my child receive payment for participation?**

Your child will receive a small compensation for their participation. This is to help cover the cost of transportation back to the clinic for their follow-up appointment and survey. It is also to and to thank them for the time they spend in the study. They will receive compensation for their travel cost and a small gift, together up to a value of TSH\$6,000.

**Are there costs to participate?**

There are no costs to you to participate in this study.

**How will my personal information be protected?**

The following procedures will be used to protect the confidentiality of your data. Your name will not appear on any research records. The researchers will keep all study records

Version Date: June 20, 2012

Approval Date: \_\_\_\_\_

Sign By Date: \_\_\_\_\_

Page 2 of 4

Subject Initials: \_\_\_\_\_

**Tulane University Human Research Protection Office**  
**Biomedical IRB Consent Script for Participation in a Research Study**  
*Integration of HIV Counseling and Testing with Voluntary Medical Male Circumcision*

locked in a secure location and the only people that will have access to them are members of the research staff. All electronic files (e.g., database, spreadsheet, etc.) will be password protected. Any computer hosting such files will also have password protection to prevent access by unauthorized users. Only the members of the research staff will have access to the passwords. At the conclusion of this study, the researchers may publish their findings. Information will be presented in summary format and you will not be identified in any publications or presentations. Any data described in this paragraph will be maintained in accordance with the security provisions of this paragraph until destroyed by the researchers at the conclusion of the study.

You should also know that the Tulane University Human Research Protection Office and the Biomedical Institutional Review Board (IRB) may inspect study records as part of its auditing program. These reviews will only focus on the researchers and not on your responses or involvement. The IRB is a group of people who review research studies to protect the rights and welfare of research participants.

**Can I stop being in the study and what are my rights?**

Your child does not have to be in this study if they do not want to. If you and your child agree to be in the study, but change your minds at any time, they may ask the researcher to stop the survey. There are no penalties or consequences of any kind if you decide that you do not want your child to participate. Your child does not have to answer any question that they do not want to answer. The services you came here for will not be taken away or changed if you decide you do not want your child to participate.

**Who do I contact if I have questions about the study?**

Take as much time as you like before you make a decision to participate in this study. We will be happy to answer any question you have about this study. If you have further questions about this study, want to voice concerns or complaints about the research or if you have a research-related problem, you may contact the principal investigator, Katherine Andrinopoulos ([kandrino@tulane.edu](mailto:kandrino@tulane.edu)). In Tanzania you may contact Mr. Renatus Kisendi (0753 063 323 or [kisendik@yahoo.com](mailto:kisendik@yahoo.com)). If you would like to discuss your rights as a research participant, discuss problems, concerns, and questions; obtain information; or offer input with an informed individual who is unaffiliated with the specific research, you may contact the Tulane University Human Research Protection Office (in the state of Louisiana, United States) at [irbmain@tulane.edu](mailto:irbmain@tulane.edu).

Version Date: June 20, 2012

Approval Date: \_\_\_\_\_

Sign By Date: \_\_\_\_\_

Page 3 of 4

Subject Initials: \_\_\_\_\_

**Tulane University Human Research Protection Office**  
**Biomedical IRB Consent Script for Participation in a Research Study**  
*Integration of HIV Counseling and Testing with Voluntary Medical Male Circumcision*

**Written Consent:**

The information in this form has been explained to me. Based on this information, I have decided that I will allow my child to participate in the research project described above. Its general purposes, the particulars of involvement and possible risks and inconveniences have been explained to my satisfaction. I understand that I can withdraw at any time. My signature also indicates that, if I have requested a copy of this form, one has been provided to me.

\_\_\_\_\_

Subject

\_\_\_\_\_

Date

\_\_\_\_\_

Parent/Legally Authorized Representative (if applicable)

\_\_\_\_\_

Date

\_\_\_\_\_

Person Obtaining Consent

\_\_\_\_\_

Date

I am unable to read but this consent document has been read and explained to me by \_\_\_\_\_ (name of reader). I volunteer to participate in this research.

\_\_\_\_\_

Subject

\_\_\_\_\_

Date

\_\_\_\_\_

Witness

\_\_\_\_\_

Date

\_\_\_\_\_

Person Obtaining Consent

\_\_\_\_\_

Date

Version Date: June 20, 2012

Approval Date: \_\_\_\_\_

Sign By Date: \_\_\_\_\_

Page 4 of 4

Subject Initials: \_\_\_\_\_
